## P415

**Dark-Blood T1 SAPHIRE mapping gives cleaner myocardial signal at both 1.5T and 3T**

Bicho Augusto JA.<sup>1</sup>; Alfarihi M.<sup>1</sup>; Knott K.<sup>1</sup>; Radenkovic D.<sup>1</sup>; Chaturvedi N.<sup>1</sup>; Hughes AD.<sup>1</sup>; Boubertakh R.<sup>2</sup>; Moon JC.<sup>2</sup>; Weingartner S.<sup>3</sup>; Cap-tur G.<sup>1</sup>

<sup>1</sup>University College London, London, United Kingdom of Great Britain & Northern Ireland

<sup>2</sup>Barts Health NHS Trust, London, United Kingdom of Great Britain & Northern Ireland

<sup>3</sup>University of Minnesota, Minneapolis, United States of America

**Background:** Partial-voluming effects at the myocardial-blood interface may falsely increase myocardial T1 mapping times.

**Purpose:** We hypothesize that dark-blood (DB) native myocardial T1 times by SAPHIRE (modified Saturation Pulse Prepared Heart-rate independent Inversion Recovery) have significantly less myocardial signal contamination from blood in comparison to conventional bright-blood T1 mapping at 1.5T and 3T.

**Methods:** Same-day CMR was prospectively performed on 10 healthy volunteers ( $36.2 \pm 10.0$  years, 20% males) at 1.5T and 3T (Aera/Prisma, Siemens) using both conventional and DB SAPHIRE. Mean T1 times per slice (basal, mid and apical short-axis) and global values were measured. Endocardial and epicardial borders were manually drawn with a 10% offset. Normal ranges were defined as mean  $\pm$  2 standard deviations. Mean values are presented.

**Results:** Normal ranges at 1.5T were 1228-1383ms for conventional SAPHIRE and 1180-1302ms for DB SAPHIRE. T1 times were significantly lower by DB vs conventional SAPHIRE in global myocardial assessment. (1241 vs 1305ms,  $p = 0.005$ ). No significant in the basal (1229 vs 1281ms,  $p = 0.075$ ) or mid slices (1245 vs 1270ms,  $p = 0.263$ ), but apical slices had lower T1 values using DB SAPHIRE (1246 vs 1348ms,  $p = 0.043$ ).

Normal ranges at 3T were 1557-1731ms for conventional SAPHIRE and 1524-1666ms for DB SAPHIRE. Global myocardial T1 times were significantly lower by DB vs conventional SAPHIRE (1595 vs 1644ms,  $p = 0.015$ ) but not in slice-specific reads (basal: 1598 vs 1639ms,  $p = 0.138$ ; mid: 1598 vs 1598ms,  $p = 0.612$ ; apical: 1608 vs 1666ms,  $p = 0.109$ ). The myocardial signal intensity range in DB SAPHIRE was smaller vs conventional SAPHIRE (Figure).

**Conclusion:** Black-blood SAPHIRE T1 mapping significantly reduces myocardial signal contamination from blood at both 1.5 and 3T and may have value in the deep-phenotyping of thin-walled hearts.

Abstract P415 Figure.

**Figure.** Signal intensity in the mid septum at 3T on patient #8 showed a higher range of signal values for the conventional SAPHIRE vs DB SAPHIRE (in this case, range of values was 529ms for conventional T1 vs 210ms for DB T1).

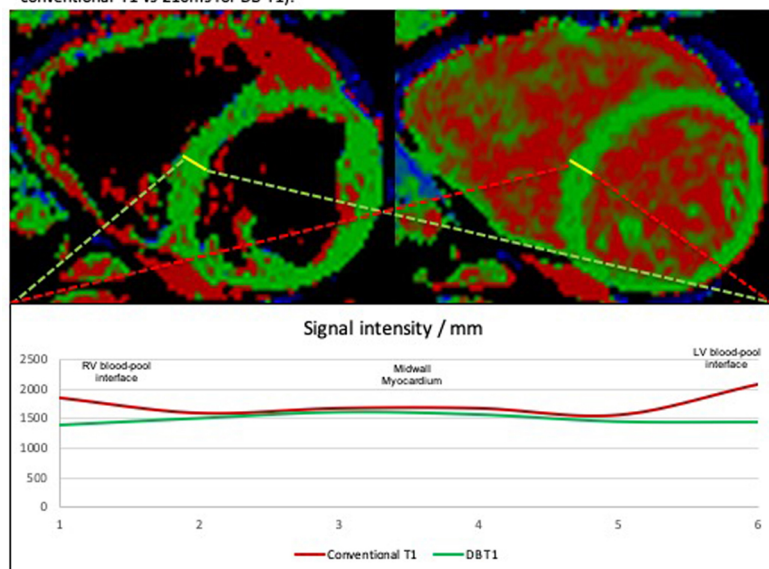

Source: http://academic.oup.com/ehjcimaging/article-pdf/20/Supplement_2/jez118.003/28764172/jez118.003.pdf
